# Supplementary material
Source: PubMed Central journal article supplement (PMC6777615)
Supplement: 41431_2019_455_MOESM1_ESM.pdf [file 41431_2019_455_MOESM1_ESM.pdf]

## Supplementary figure S1

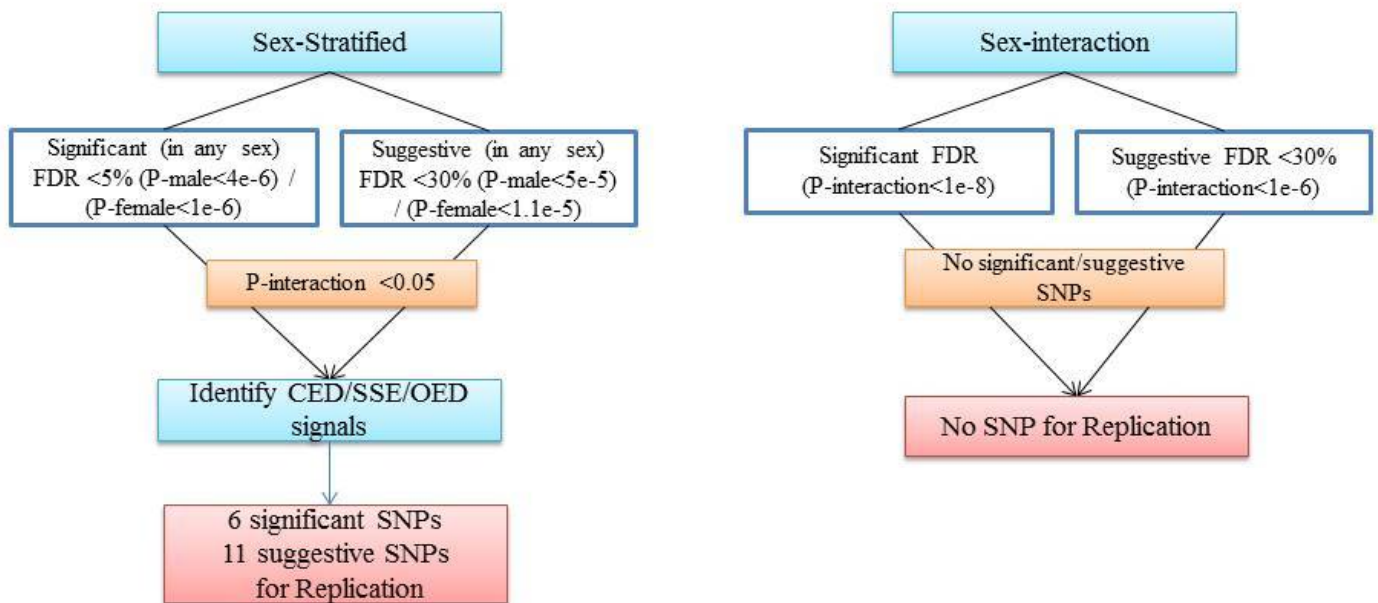

Fig: Criteria for selection of SNPs to carry forward for replication

Fig S2 Regional plot of SNP(s) without LD cluster in hg19 1000gEUR

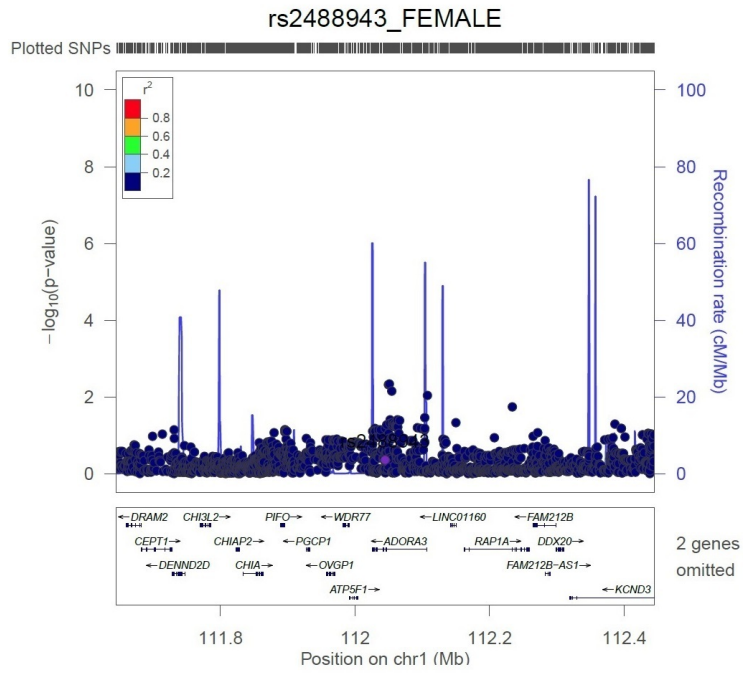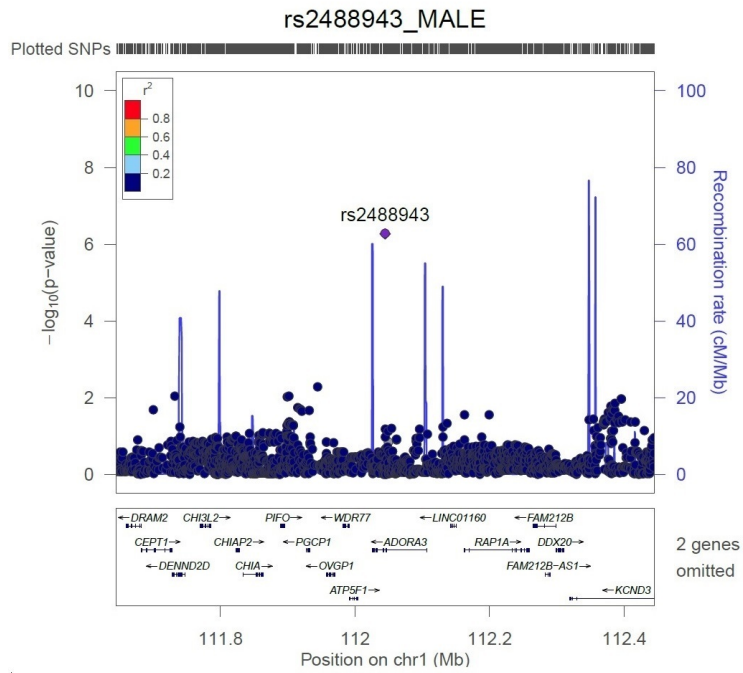

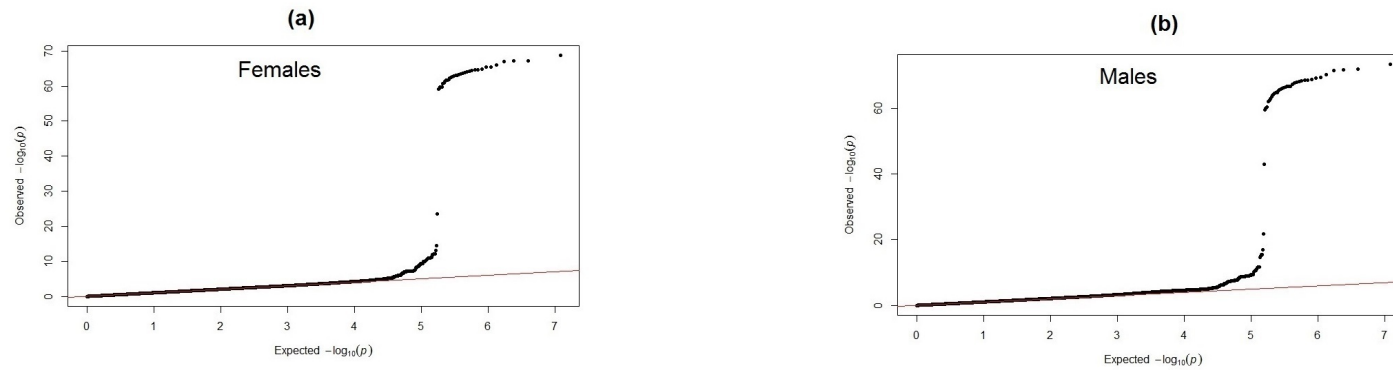

Fig S3: Quantile-Quantile plots of GWAS P-values in (a) female and (b) male datasets

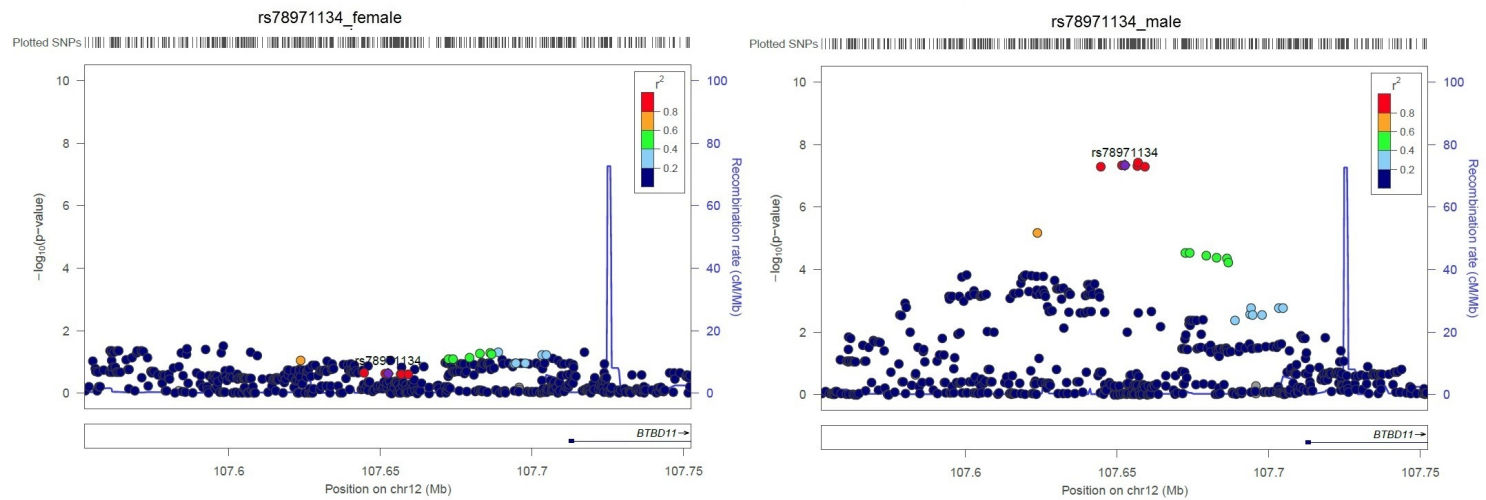

Fig S4(a) Regional LD plot of the significant SNPs in the discovery series

Fig S4(a) Regional LD plot of the significant SNPs in the discovery series

rs2121266\_female

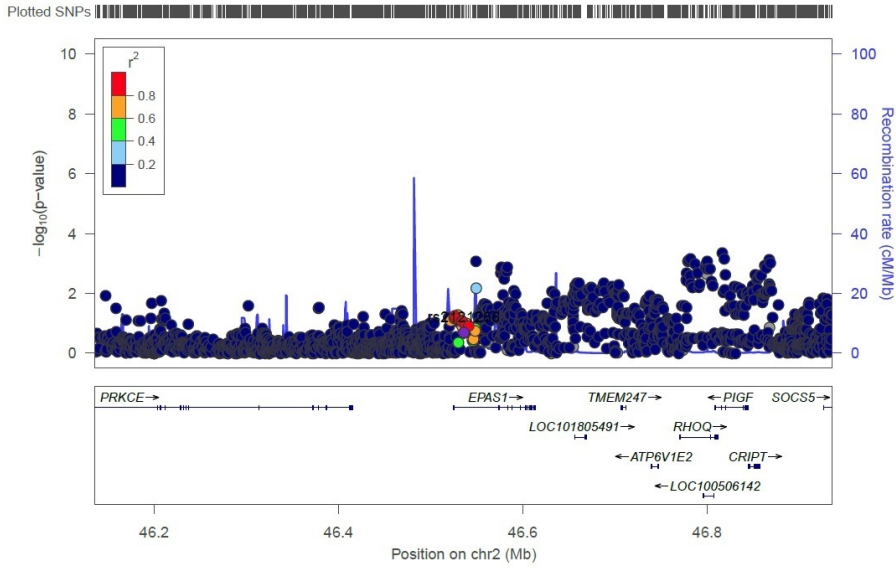

rs2121266\_male

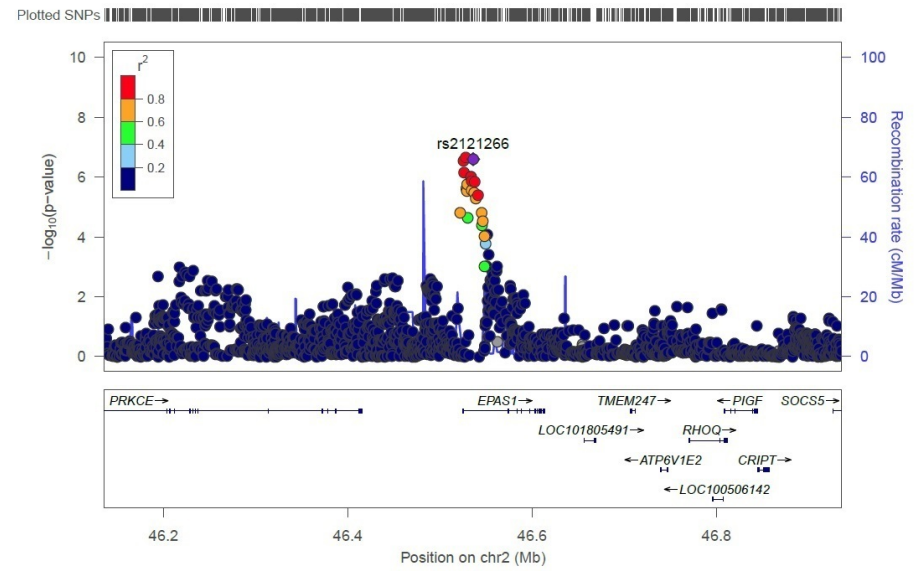

rs12930199\_female

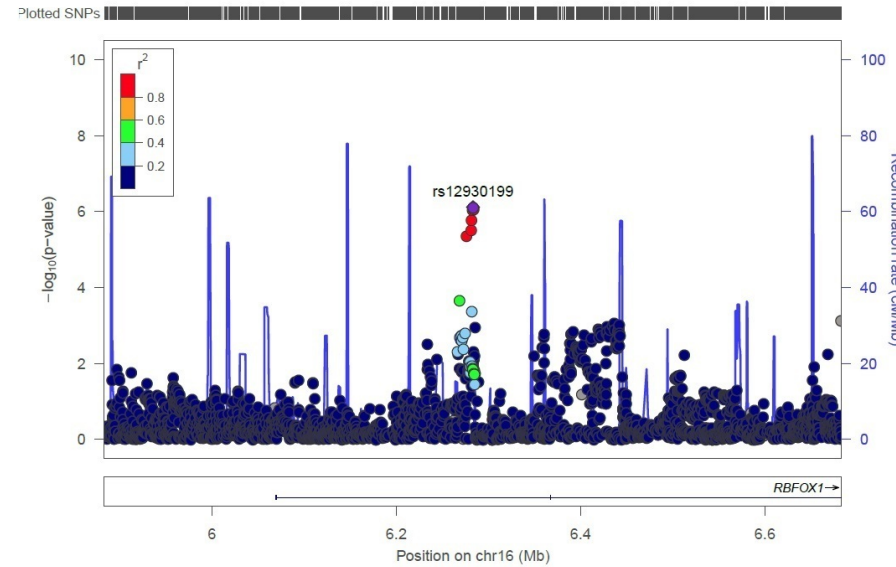

rs12930199\_male

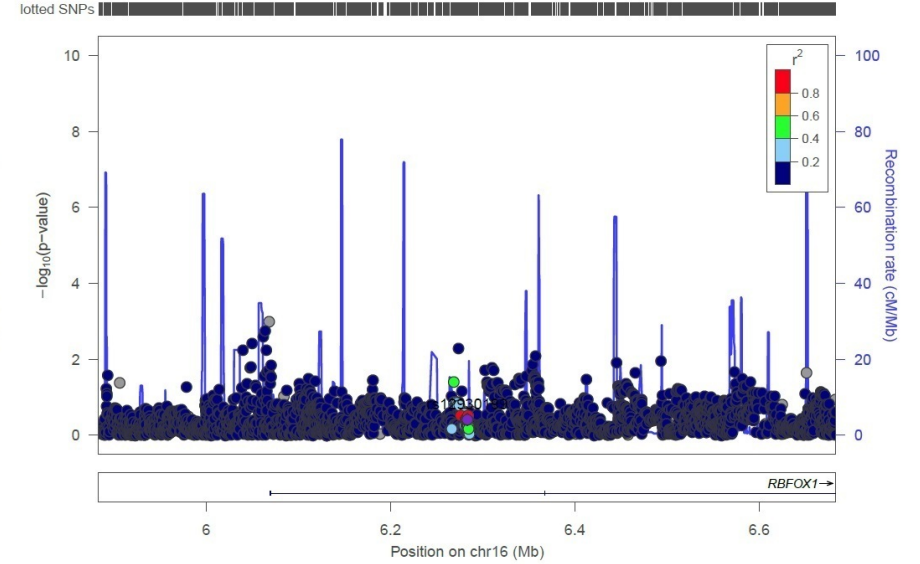

Fig S4(a) Regional LD plot of the significant SNPs in the discovery series

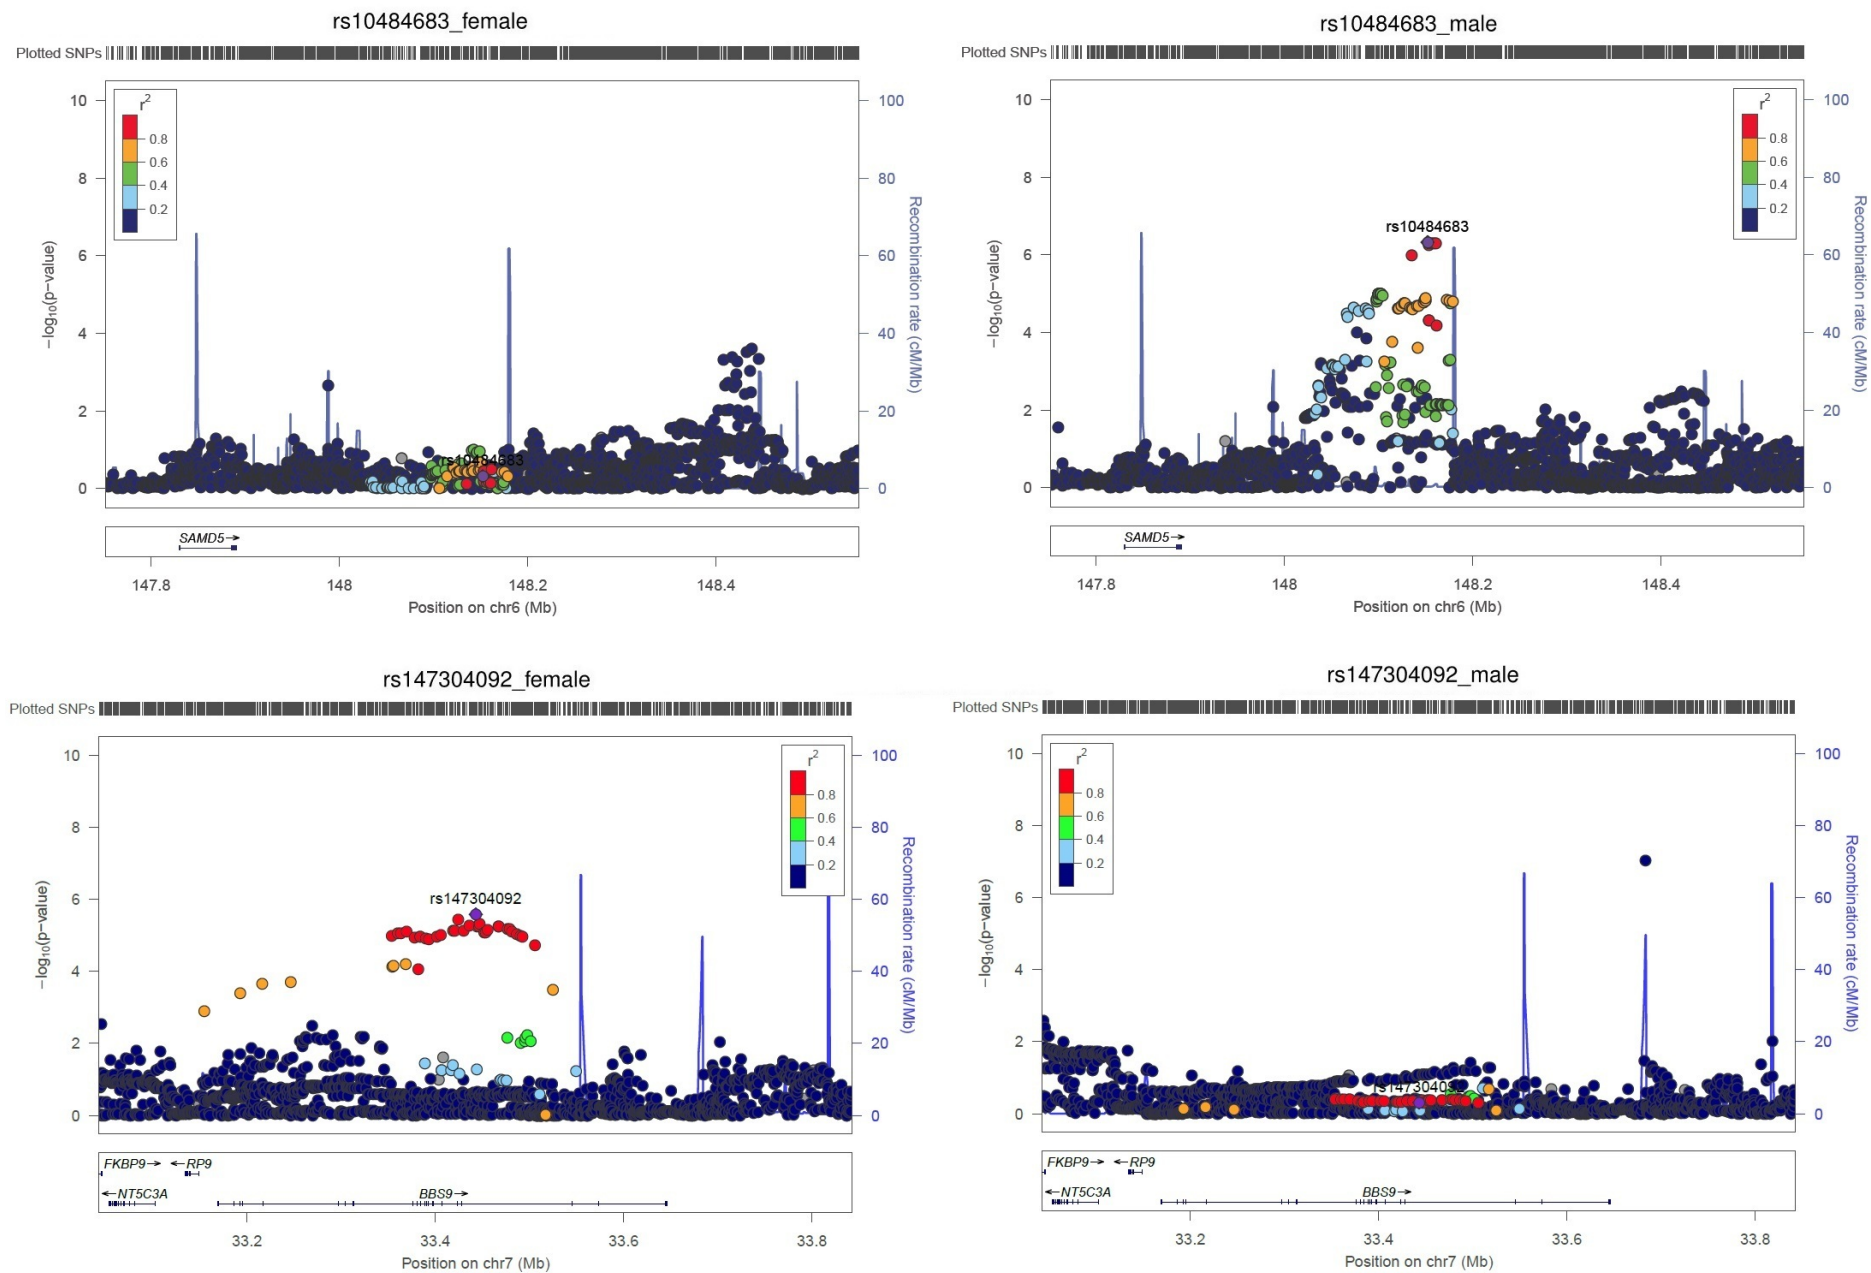

Fig S4(b) Regional plot of the suggestive SNPs in the discovery series

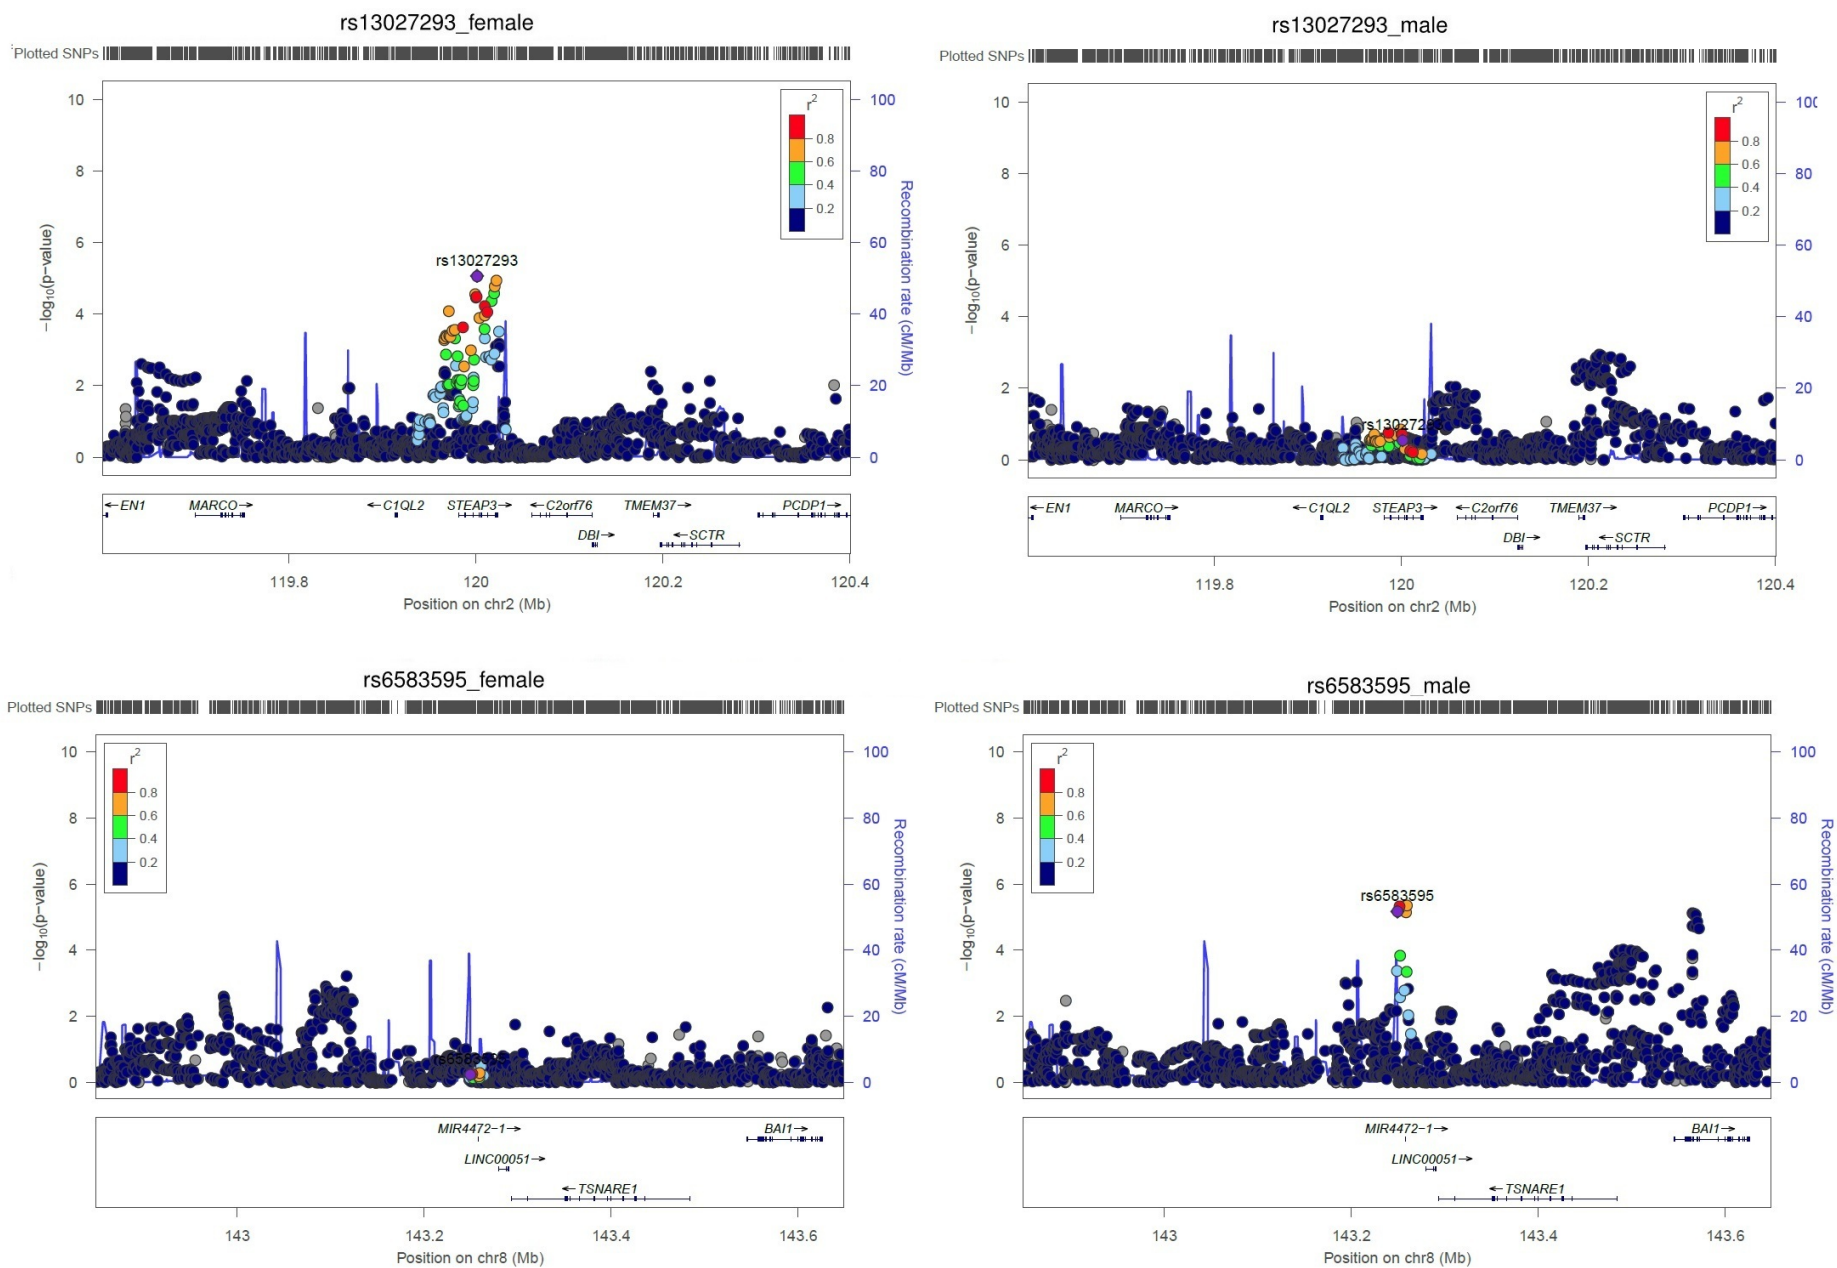

Fig S4(b) Regional plot of the suggestive SNPs in the discovery series

rs6554676\_female

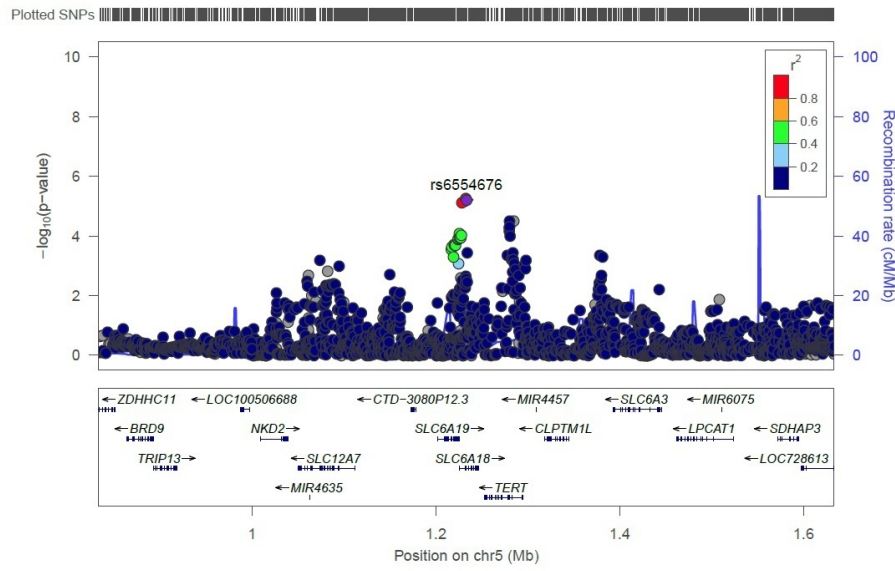

rs6554676\_male

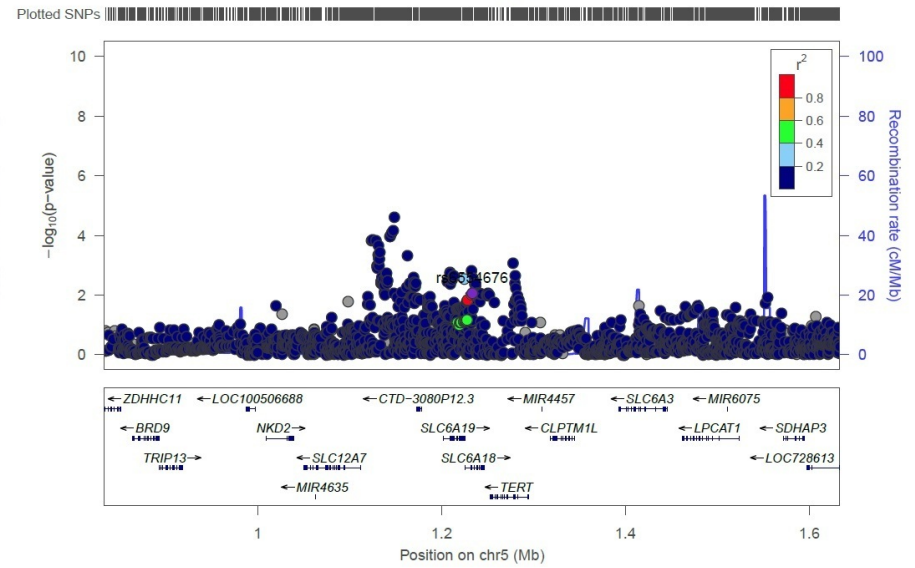

rs4074759\_female

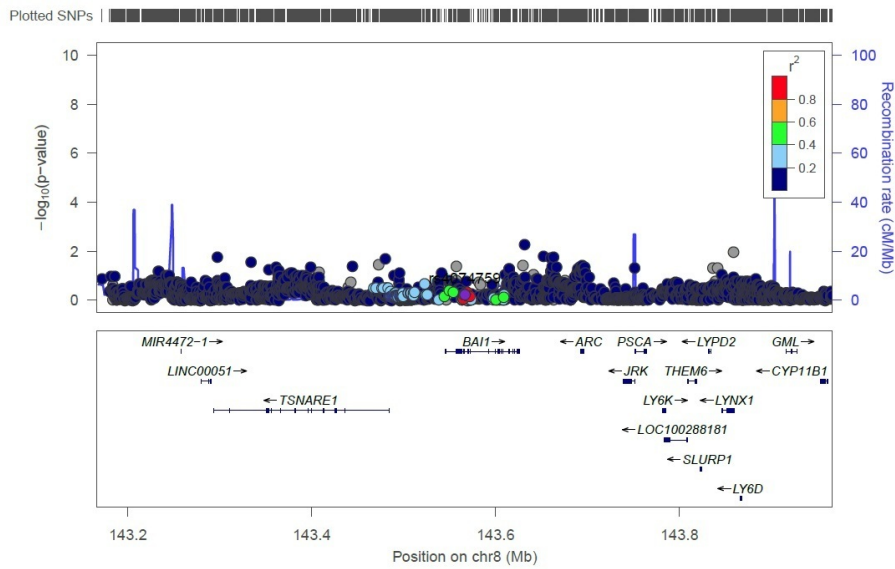

rs4074759\_male

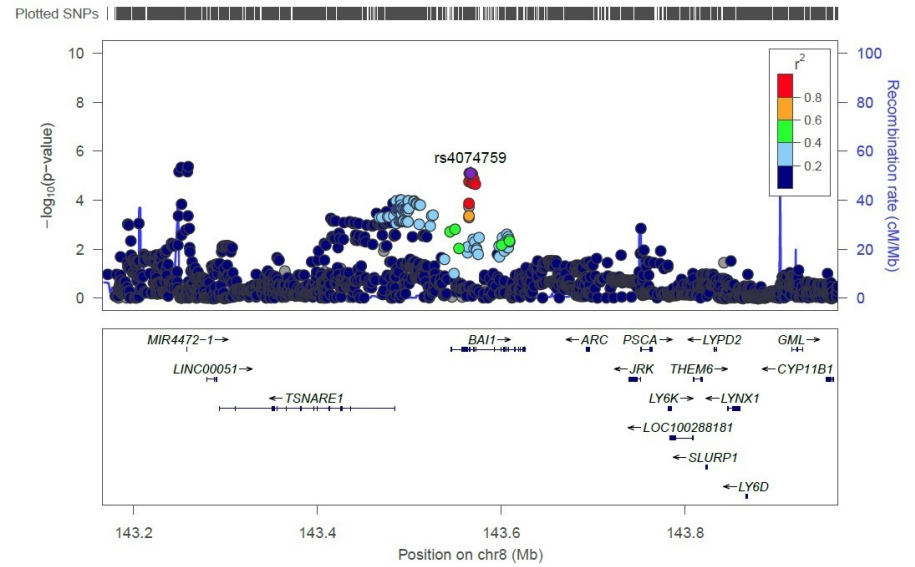

Fig S4(b) Regional plot of the suggestive SNPs in the discovery series  
rs7076813\_female

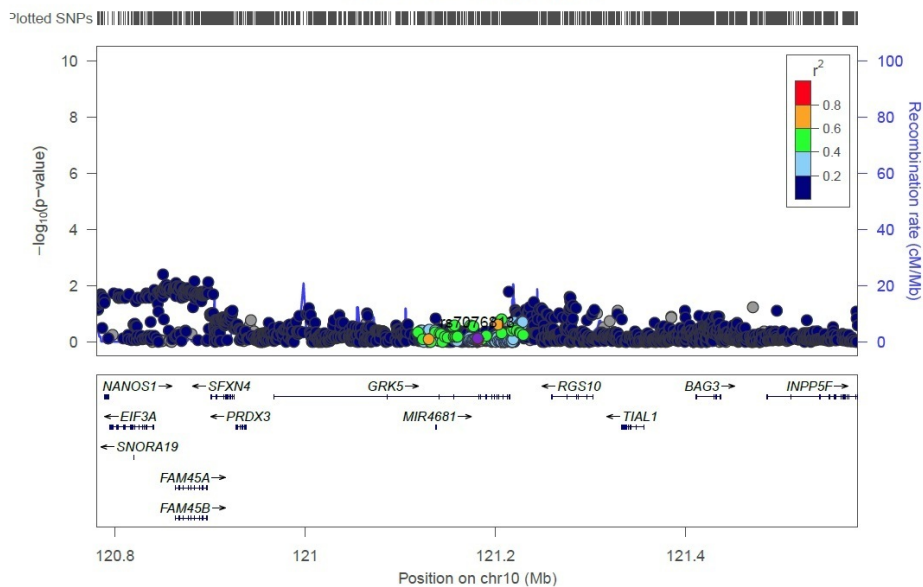

rs7076813\_male

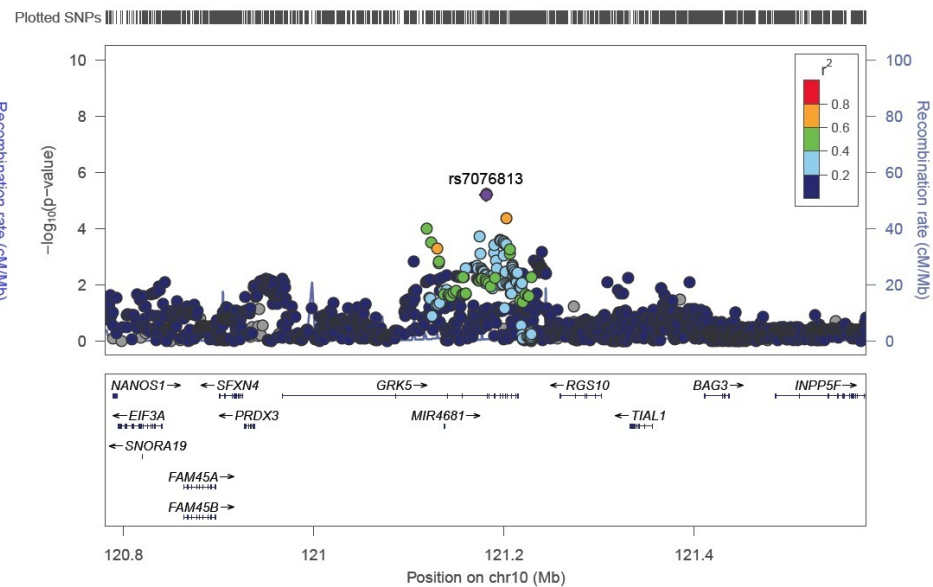

rs35121694\_female

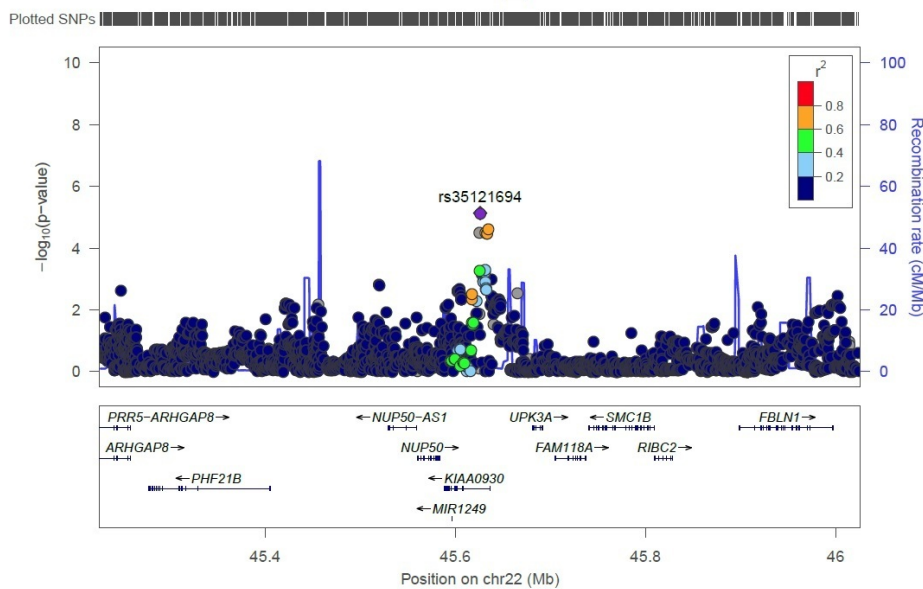

rs35121694\_male

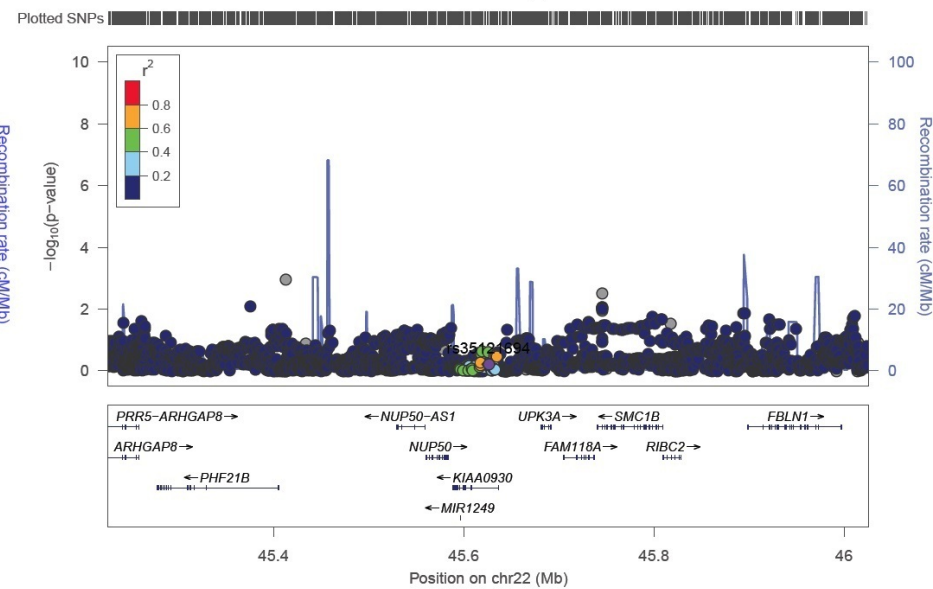



Fig S4(b) Regional plot of the suggestive SNPs in the discovery series

rs12364512\_female

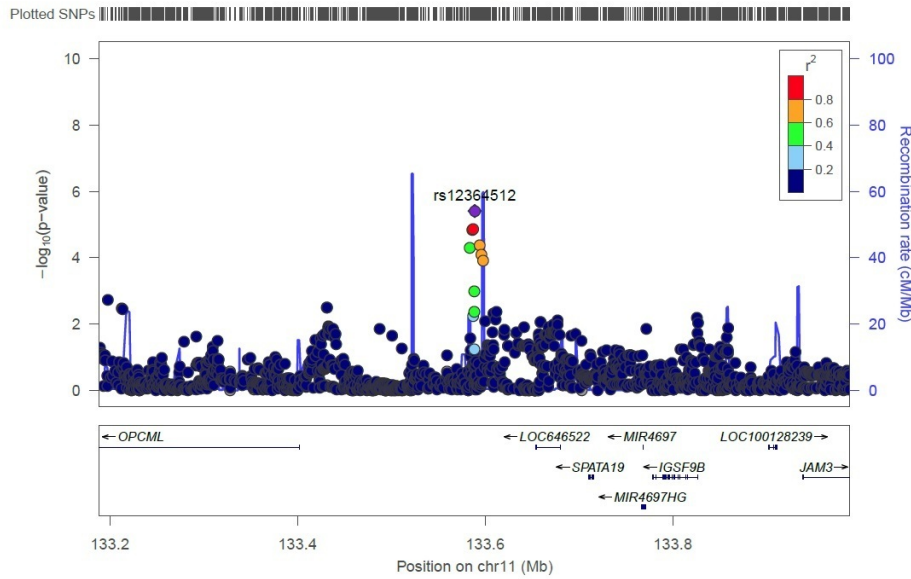

rs12364512\_male

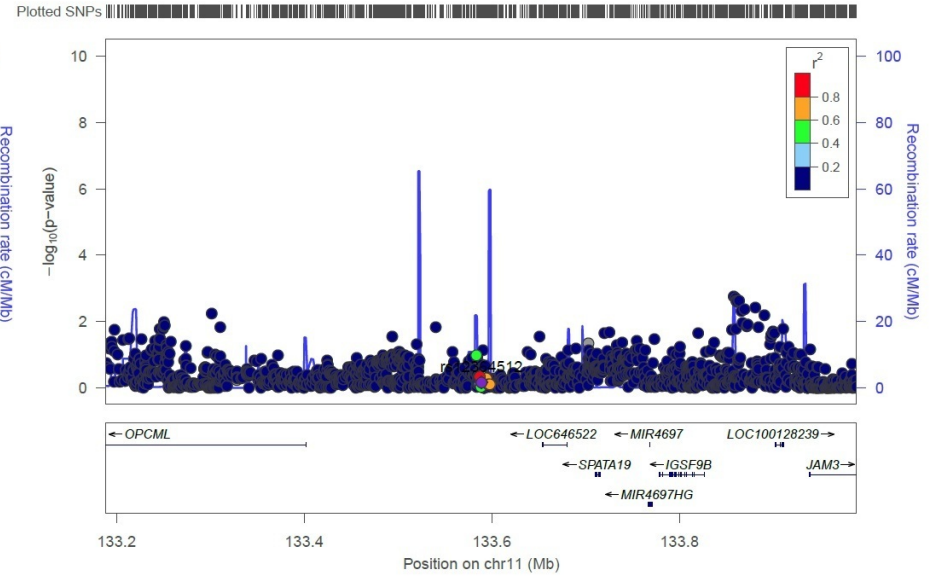

rs11744892\_female

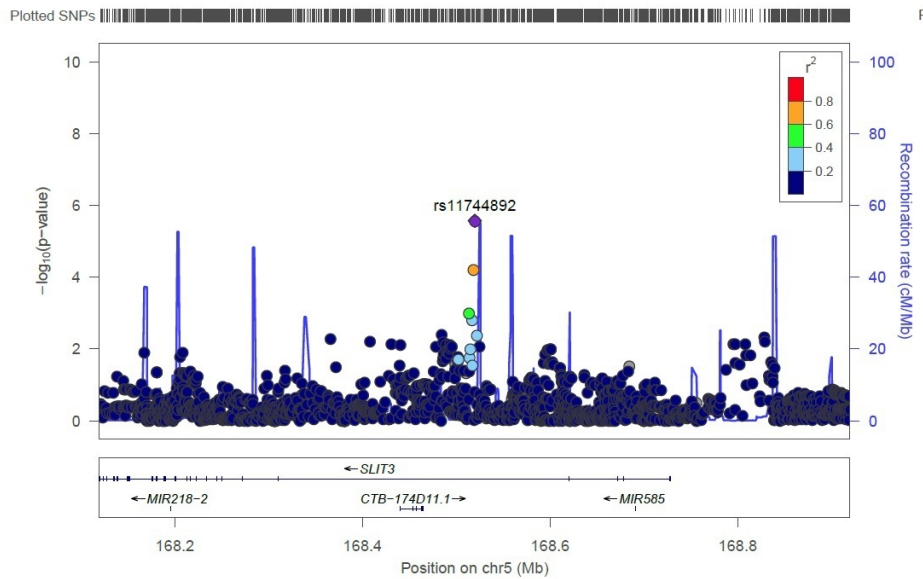

rs11744892\_male

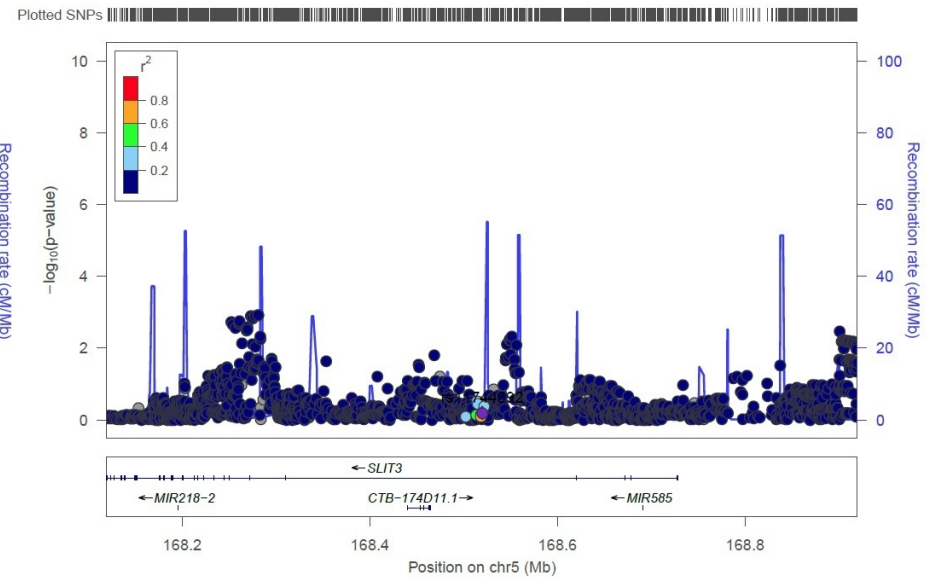

Fig S4(b) Regional plot of the suggestive SNPs in the discovery series

rs2530551\_female

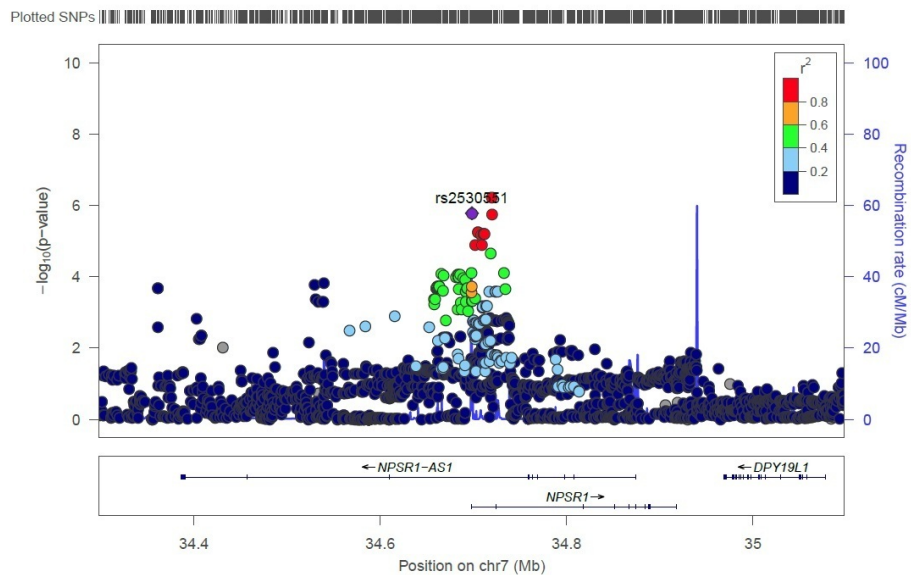

rs2530551\_male

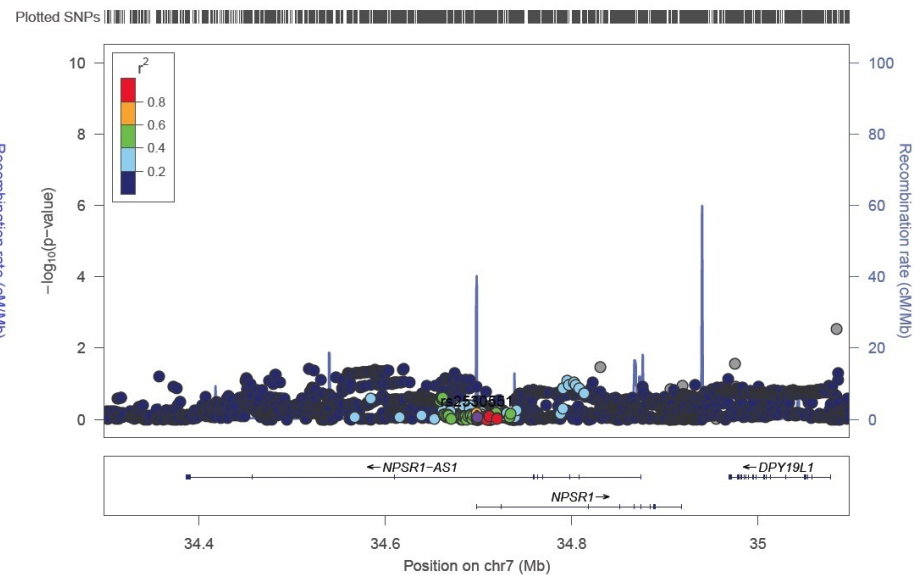

rs56960822\_female

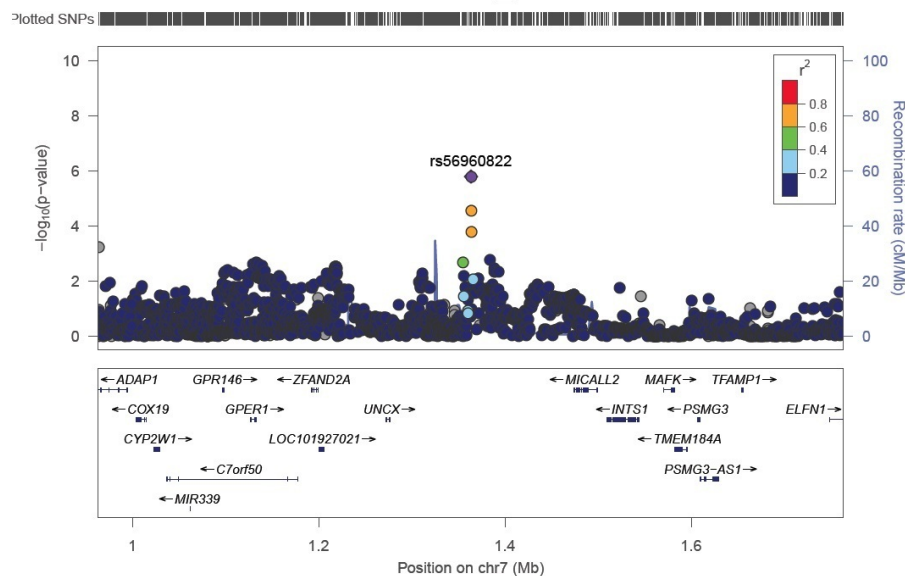

rs56960822\_male

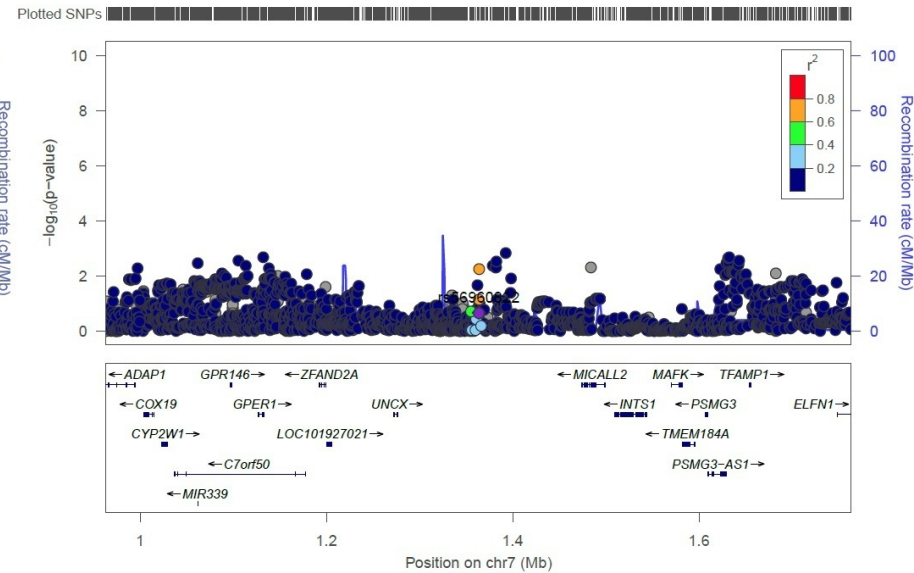

Fig S5(a) Quantile-quantile plot of sex x genotype interaction from the discovery series

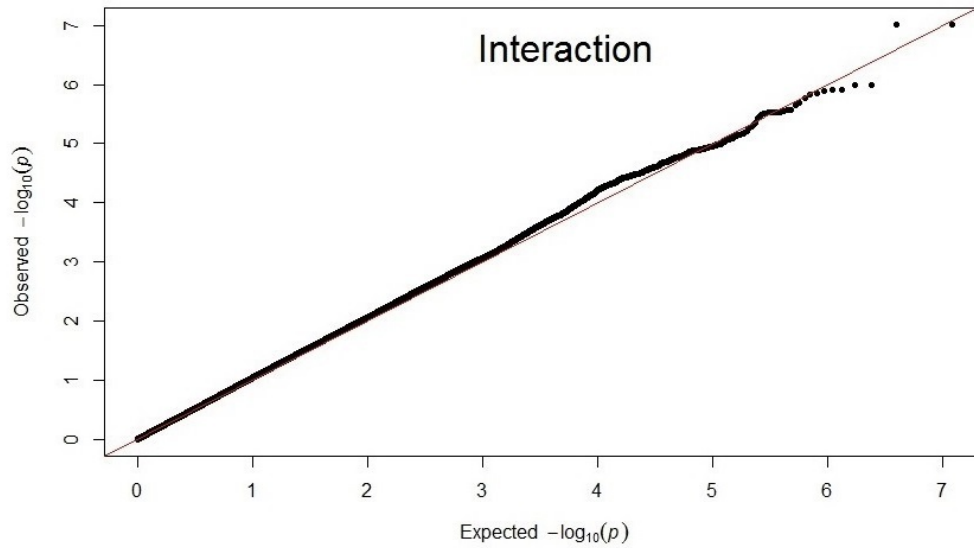

Fig S5(b) Manhattan plot of sex x genotype interaction from the discovery series

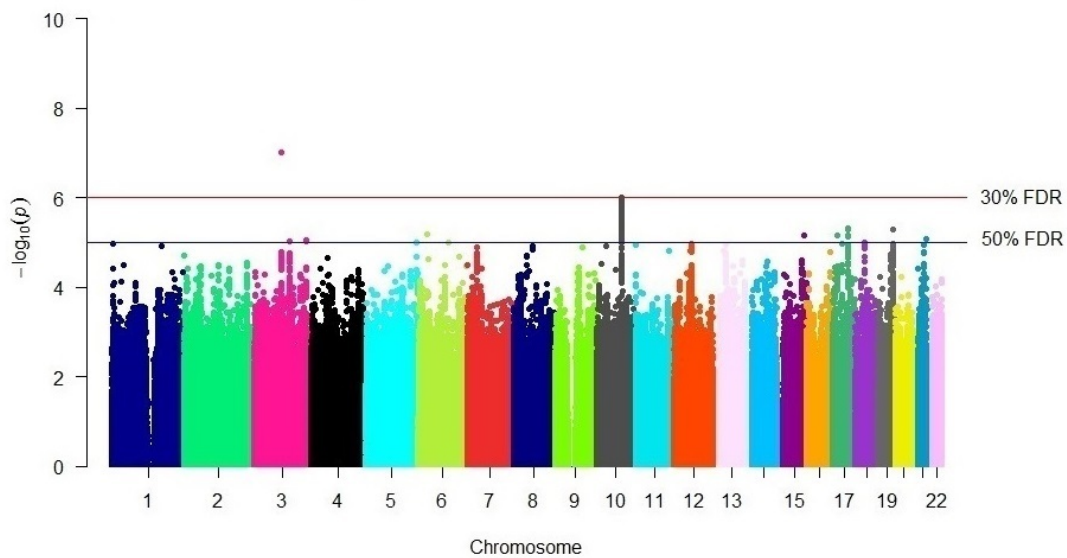

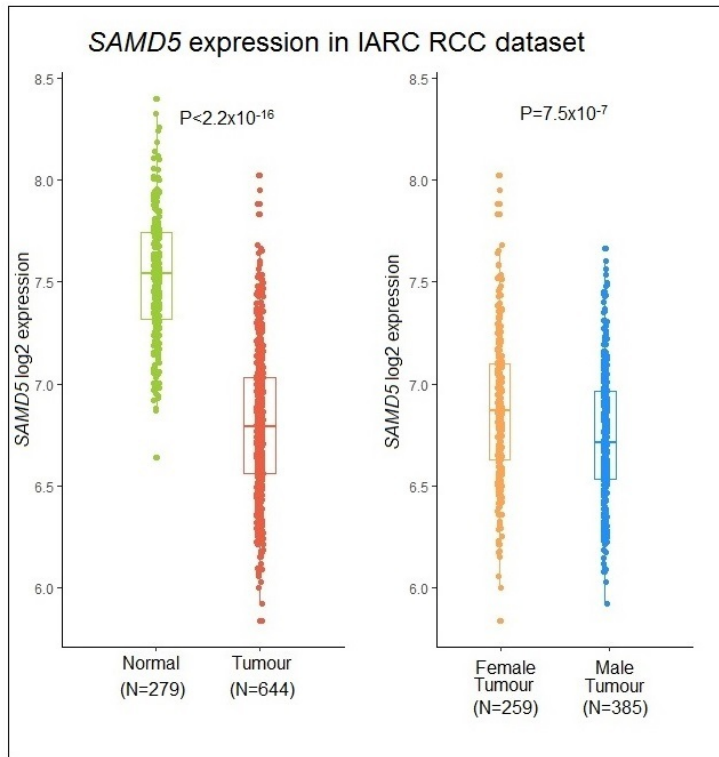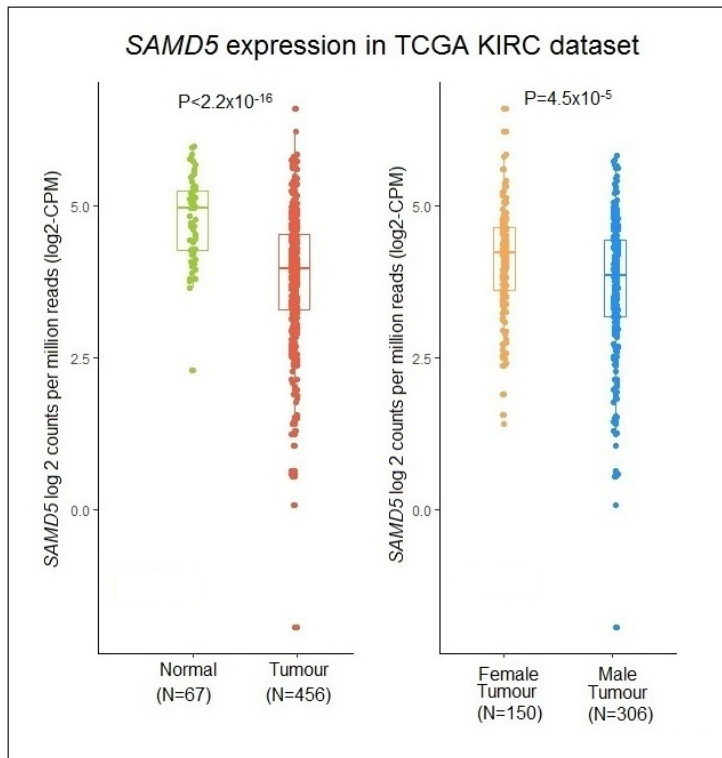

Fig S6: Comparison of SAMD5 expression in IARC and TCGA datasets. P-values are from two sample T-test

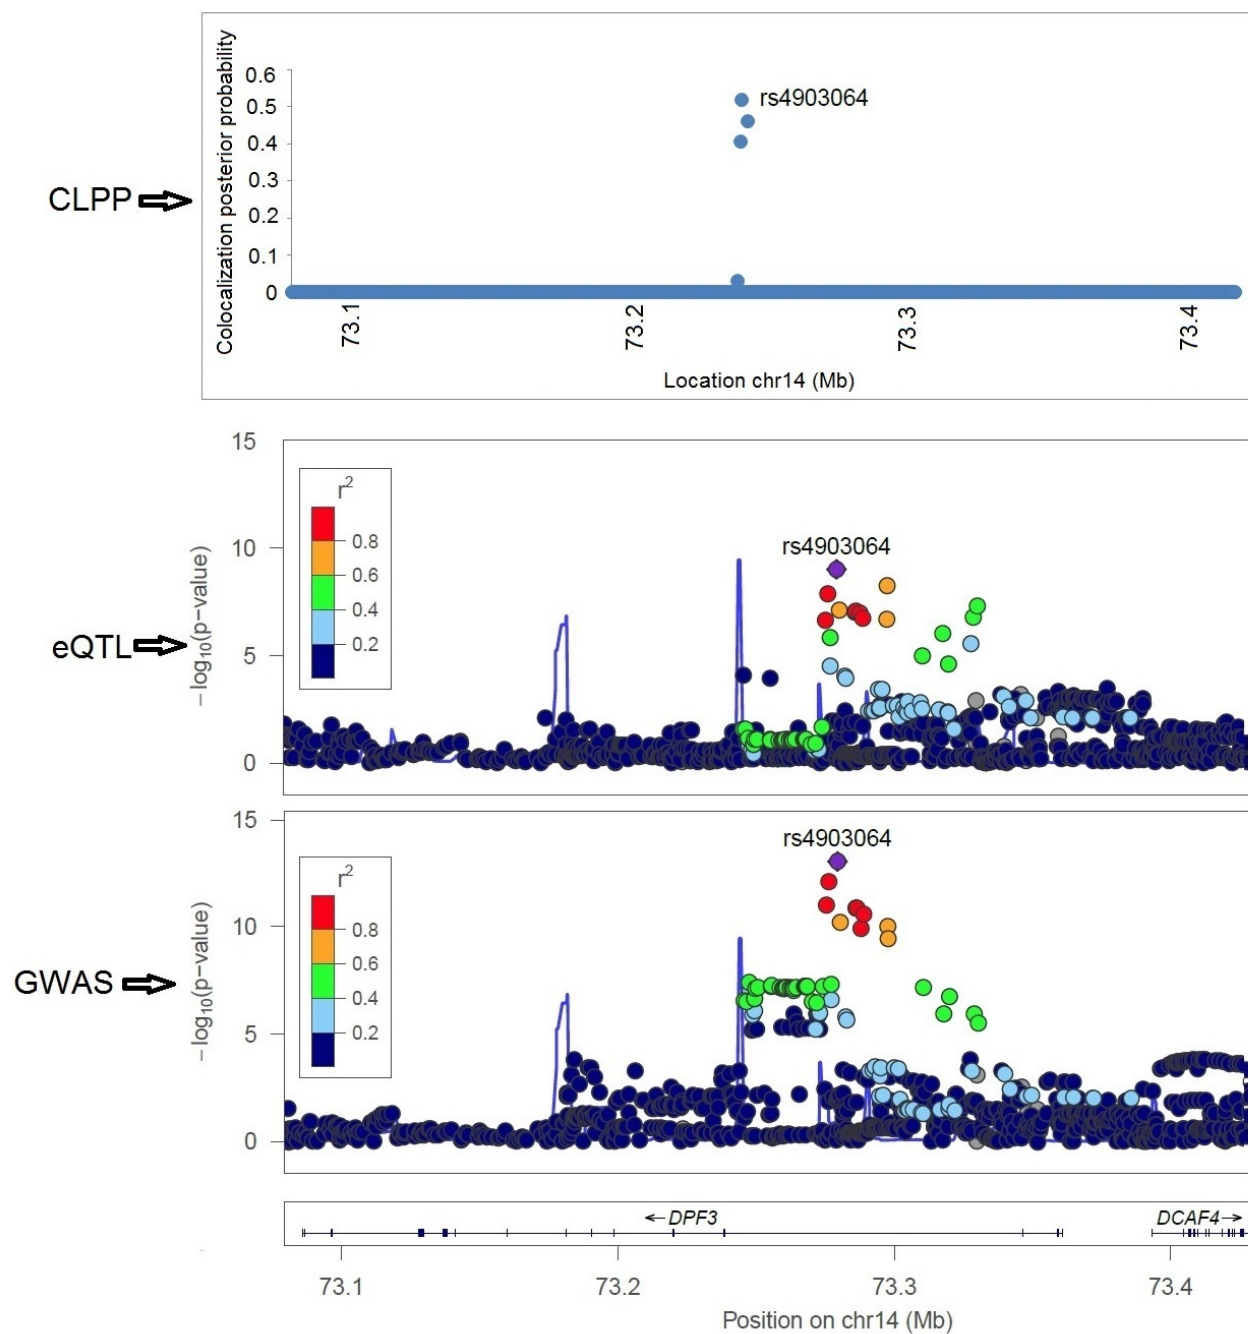

Fig S7 : Figure showing colocalization of GWAS and eQTL plots. Colocalization posterior probability (CLPP) is the probability that the same variant is causal in both GWAS and eQTL.
