# Supplementary material
Source: PubMed Central journal article supplement (PMC6777615)
Supplement: 41431_2019_455_MOESM2_ESM.pdf [file 41431_2019_455_MOESM2_ESM.pdf]

Supplementary Table 1. List of previously reported RCC GWAS loci

| Locus          | SNP          | Nearest Gene             | Previously Reported GWAS     |      |           | Current Study           |        |           |                       |      |           |                       |
|----------------|--------------|--------------------------|------------------------------|------|-----------|-------------------------|--------|-----------|-----------------------|------|-----------|-----------------------|
|                |              |                          | Study                        | OR   | 95% CI    | P                       | Female |           |                       | Male |           |                       |
|                |              |                          |                              |      |           |                         | OR     | 95% CI    | P                     | OR   | 95% CI    | P                     |
| 1p32.3         | rs4381241    | <i>FAF1</i>              | Scelo et al. (ref. 12)       | 1.11 | 1.07-1.15 | 3.1 x 10 <sup>-10</sup> | 1.17   | 1.08-1.27 | 4.0x10 <sup>-4</sup>  | 1.15 | 1.06-1.24 | 9.3x10 <sup>-5</sup>  |
| 2p21           | rs7579899**  | <i>EPAS1</i>             | Purdue et al. (ref. 8)       | 1.15 | 1.10-1.21 | 2.3 x 10 <sup>-9</sup>  | 1.08   | 0.99-1.16 | 0.11                  | 1.19 | 1.12-1.26 | 1.4x10 <sup>-6</sup>  |
| 2p21           | rs11894252** | <i>EPAS1</i>             | Purdue et al. (ref. 8)       | 1.14 | 1.09-1.20 | 1.8 x 10 <sup>-8</sup>  | 1.09   | 1.01-1.18 | 0.08                  | 1.19 | 1.12-1.26 | 9.3x10 <sup>-7</sup>  |
| 2q22.3         | rs12105918   | <i>ZEB2</i>              | Henrion et al. (ref. 10)     | 1.29 | 1.18-1.41 | 1.8 x 10 <sup>-8</sup>  | 1.12   | 0.94-1.34 | 0.21                  | 1.25 | 1.09-1.43 | 0.001                 |
| 3p22.1         | rs67311347   |                          | Scelo et al. (ref. 12)       | 0.9  | 0.87-0.94 | 2.5 x 10 <sup>-8</sup>  | 0.86   | 0.78-0.95 | 0.005                 | 0.89 | 0.82-0.96 | 0.006                 |
| 3q26.2         | rs10936602   | <i>LRR1Q4</i>            | Scelo et al. (ref. 12)       | 0.9  | 0.87-0.93 | 8.8 x 10 <sup>-9</sup>  | 0.9    | 0.82-0.99 | 0.03                  | 0.91 | 0.86-0.96 | 0.02                  |
| 8p21.3         | rs2241261    | <i>RHOBTB2/TNFRSF10B</i> | Scelo et al. (ref. 12)       | 1.1  | 1.06-1.13 | 5.8 x 10 <sup>-9</sup>  | 1.12   | 1.03-1.21 | 0.007                 | 1.11 | 1.03-1.2  | 0.002                 |
| 8q24           | rs35252396*  |                          | Gudmundsson et al. (ref. 13) | 1.27 | 1.18-1.37 | 5.4 x 10 <sup>-11</sup> | 1.17   | 1.08-1.26 | 3.0x10 <sup>-4</sup>  | 1.09 | 1.03-1.16 | 0.01                  |
| 10q24.33-q25.1 | rs11813268   | <i>OBFC1</i>             | Scelo et al. (ref. 12)       | 1.12 | 1.07-1.17 | 3.9 x 10 <sup>-8</sup>  | 1.11   | 0.99-1.25 | 0.06                  | 1.13 | 1.02-1.25 | 0.007                 |
| 11q13          | rs7105934    |                          | Purdue et al. (ref. 8)       | 0.69 | 0.62-0.76 | 7.8 x 10 <sup>-14</sup> | 0.67   | 0.56-0.8  | 3.0x10 <sup>-4</sup>  | 0.66 | 0.56-0.77 | 3.0x10 <sup>-8</sup>  |
| 11q22.3        | rs74911261   | <i>KDELC2</i>            | Scelo et al. (ref. 12)       | 1.41 | 1.27-1.57 | 2.1 x 10 <sup>-10</sup> | 1.34   | 0.99-1.8  | 0.05                  | 1.46 | 1.13-1.88 | 0.005                 |
| 11q22.3        | rs1800057    | <i>ATM</i>               | Scelo et al. (ref. 12)       | 1.38 | 1.23-1.53 | 9.0 x 10 <sup>-9</sup>  | 1.44   | 1.05-1.97 | 0.02                  | 1.52 | 1.15-2.01 | 0.004                 |
| 12p11.23       | rs718314     | <i>ITPR2</i>             | Wu et al. (ref. 9)           | 1.19 | 1.13-1.26 | 8.9 x 10 <sup>-10</sup> | 1.14   | 1.03-1.26 | 0.004                 | 1.25 | 1.18-1.33 | 1.6x10 <sup>-9</sup>  |
| 12p11.23       | rs1049380    | <i>ITPR2</i>             | Wu et al.(ref. 9)            | 1.18 | 1.12-1.25 | 6.1 x 10 <sup>-9</sup>  | 1.18   | 1.07-1.30 | 4.0x10 <sup>-4</sup>  | 1.27 | 1.17-1.37 | 7.0x10 <sup>-10</sup> |
| 12q24          | rs4765623    | <i>SCARB1</i>            | Purdue et al. (ref. 8)       | 1.15 | 1.09-1.20 | 2.6 x 10 <sup>-8</sup>  | 1.2    | 1.11-1.3  | 4.0x10 <sup>-5</sup>  | 1.14 | 1.05-1.23 | 2.0x10 <sup>-4</sup>  |
| 14q24.2        | rs4903064    | <i>DPF3</i>              | Scelo et al. (ref. 12)       | 1.21 | 1.16-1.25 | 2.2 x 10 <sup>-24</sup> | 1.47   | 1.33-1.62 | 9.0x10 <sup>-14</sup> | 1.09 | 1.01-1.19 | 0.02                  |

\*Current study based on rs6470588, in complete LD with rs35252396.

\*\*In complete linkage disequilibrium with sex-specific variant rs2121266 described the current study

## Supplementary table 2

## Details of the seventeen SNPs with sex-specific effects in the discovery GWAS

| SNP         | HGVS Nomenclature (GRCh37)  | Nearest Gene     | Position   | Locus    | FDR  | SNP effect | Females (N=5,087) |                       | Males (N=8,143) |                      | P-interaction        |
|-------------|-----------------------------|------------------|------------|----------|------|------------|-------------------|-----------------------|-----------------|----------------------|----------------------|
|             |                             |                  |            |          |      |            | MAF (Co/Ca)       | P-value               | MAF (Co/Ca)     | P-value              |                      |
| rs4903064   | NC_000014.8:g.73279420T>C   | <i>DPF3</i>      | Intron     | 14q24.2  | <5%  | CED        | 0.21/0.28         | 9.0x10 <sup>-14</sup> | 0.23/0.25       | 0.02                 | 1.7x10 <sup>-5</sup> |
| rs2121266   | NC_000002.11:g.46535924C>A  | <i>EPAS1</i>     | Intron     | 2p21     | <5%  | SSE        | 0.39/0.40         | 0.2                   | 0.39/0.42       | 2.5x10 <sup>-7</sup> | 0.04                 |
| rs12930199  | NC_000016.9:g.6283321A>G    | <i>RBFOX1</i>    | Intron     | 16p13.3  | <5%  | SSE        | 0.31/0.36         | 4.0x10 <sup>-7</sup>  | 0.33/0.33       | 0.38                 | 7.2x10 <sup>-4</sup> |
| rs10484683  | NC_000006.11:g.148152077A>G | <i>SAMD5</i>     | Intergenic | 6q24.3   | <5%  | SSE        | 0.20/0.19         | 0.48                  | 0.22/0.19       | 4.7x10 <sup>-7</sup> | 0.05                 |
| rs1548141   | NC_000003.11:g.97942706C>A  | <i>OR5H6</i>     | Intron     | 3q11.2   | <5%  | SSE        | 0.50/0.50         | 0.5                   | 0.49/0.52       | 4.8x10 <sup>-7</sup> | 0.003                |
| rs78971134  | NC_000012.11:g.107652531A>G | <i>BTBD11</i>    | Intergenic | 12q23.3  | <5%  | SSE        | 0.08/0.07         | 0.23                  | 0.08/0.06       | 4.5x10 <sup>-8</sup> | 0.02                 |
| rs147304092 | NC_000007.13:g.33442937A>G  | <i>BBS9</i>      | Intron     | 7p14.3   | <30% | SSE        | 0.06/0.04         | 2.0x10 <sup>-6</sup>  | 0.05/0.06       | 0.49                 | 4.4x10 <sup>-5</sup> |
| rs11744892  | NC_000005.9:g.168519645C>T  | <i>SLIT3</i>     | Intergenic | 5q35.1   | <30% | SSE        | 0.32/0.36         | 2.0x10 <sup>-6</sup>  | 0.34/0.34       | 0.63                 | 4.2x10 <sup>-4</sup> |
| rs2530551   | NC_000007.13:g.34698321A>G  | <i>NPSR1</i>     | Intergenic | 7p14.3   | <30% | SSE        | 0.47/0.52         | 1.0x10 <sup>-6</sup>  | 0.49/0.49       | 0.84                 | 3.5x10 <sup>-4</sup> |
| rs56960822  | NC_000007.13:g.1363621C>T   | <i>UNCX</i>      | Intergenic | 7p22.3   | <30% | SSE        | 0.24/0.27         | 1.0x10 <sup>-6</sup>  | 0.25/0.26       | 0.21                 | 0.001                |
| rs13027293  | NC_000002.11:g.120001118G>T | <i>STEAP3</i>    | Intron     | 2q14.2   | <30% | SSE        | 0.34/0.37         | 8.0x10 <sup>-6</sup>  | 0.36/0.35       | 0.28                 | 5.3x10 <sup>-5</sup> |
| rs6554676   | NC_000005.9:g.1233350A>T    | <i>SLC6A18</i>   | Intron     | 5p15.33  | <30% | CED        | 0.08/0.05         | 6.0x10 <sup>-6</sup>  | 0.07/0.06       | 0.008                | 0.04                 |
| rs6583595   | NC_000008.10:g.143249252T>C | <i>MIR4472-1</i> | Intergenic | 8q24.3   | <30% | SSE        | 0.20/0.19         | 0.56                  | 0.20/0.17       | 7.0x10 <sup>-6</sup> | 0.006                |
| rs4074759   | NC_000008.10:g.143566504G>A | <i>BAI1</i>      | Intron     | 8q24.3   | <30% | SSE        | 0.17/0.17         | 0.57                  | 0.18/0.15       | 8.0x10 <sup>-6</sup> | 0.02                 |
| rs7076813   | NC_000010.10:g.121181167A>G | <i>GRK5</i>      | Intron     | 10q26.11 | <30% | SSE        | 0.24/0.23         | 0.76                  | 0.22/0.25       | 6.0x10 <sup>-6</sup> | 0.003                |
| rs12364512  | NC_000011.9:g.133588934G>A  | <i>SPATA19</i>   | Intergenic | 11q25    | <30% | SSE        | 0.12/0.16         | 4.0x10 <sup>-6</sup>  | 0.14/0.14       | 0.68                 | 3.7x10 <sup>-4</sup> |
| rs35121694  | NC_000022.10:g.45626085G>A  | <i>KIAA0930</i>  | Intron     | 22q13.31 | <30% | SSE        | 0.18/0.20         | 7.0x10 <sup>-6</sup>  | 0.19/0.19       | 0.61                 | 1.9x10 <sup>-4</sup> |

CED=Concordant Effect Direction

SSE= Single Sex Effect

Supplementary table 3

Association results of 17 SNPs from replication and joint meta-analysis

| SNP         | Nearest Gene     | Alleles | Discovery        |           |                   |           |          |                   | Replication |                  |       |           |                  |              | Combined    |                  |              |             |          |  |
|-------------|------------------|---------|------------------|-----------|-------------------|-----------|----------|-------------------|-------------|------------------|-------|-----------|------------------|--------------|-------------|------------------|--------------|-------------|----------|--|
|             |                  |         | Female           |           |                   | Male      |          |                   | Female      |                  |       | Male      |                  |              | Female      |                  |              | Male        |          |  |
|             |                  |         | (N=5,087)        |           |                   | (N=8,143) |          |                   | (N=2,974)   |                  |       | (N=8,113) |                  |              | (N=8,061)   |                  |              | (N=16,256)  |          |  |
|             |                  |         | OR[95%CI]        | P         | OR[95%CI]         | P         | P-int    | OR[95%CI]         | P           | OR[95%CI]        | P     | P-int     | OR [95%CI]       | Meta P-value | Het P-value | OR [95%CI]       | Meta P-value | Het P-value | P-int    |  |
| rs4903064   | <i>DPF3</i>      | C T     | 1.47 [1.33-1.62] | 9.0x10-14 | 1.09 [1.011-1.19] | 0.02      | 1.7x10-5 | 1.24 [1.07-1.42]  | 0.003       | 1.09[0.98-1.21]  | 0.1   | 0.18      | 1.38[1.27-1.50]  | 1.5x10-14    | 0.1         | 1.09[1.03-1.16]  | 0.005        | 0.54        | 0.002    |  |
| rs2121266   | <i>EPAS1</i>     | C A     | 1.06 [0.97-1.15] | 0.2       | 1.2 [1.12-1.28]   | 2.5x10-7  | 0.04     | 1.143 [1.00-1.30] | 0.03        | 1.15 [1.05-1.26] | 0.002 | 0.79      | 1.09 [1.01-1.17] | 0.02         | 0.002       | 1.18 [1.12-1.25] | 1.8x10-9     | 0.58        | 0.03     |  |
| rs147304092 | <i>BBS9</i>      | G A     | 0.62 [0.52-0.76] | 2.0x10-6  | 1.05 [0.91-1.22]  | 0.49      | 4.4x10-5 | 0.97 [0.76-1.24]  | 0.81        | 1.2 [1.00-1.43]  | 0.04  | 0.12      | 0.72[0.63-0.84]  | 1.0x10-5     | 0.03        | 1.11[0.99-1.24]  | 0.08         | 0.54        | 0.008    |  |
| rs13027293  | <i>STEAP3</i>    | T G     | 1.23 [1.12-1.35] | 8.0x10-6  | 0.96 [0.89-1.03]  | 0.28      | 5.3x10-5 | 0.87 [0.77-1.00]  | 0.04        | 1 [0.91-1.10]    | 0.95  | 0.16      | 1.10[1.02-1.19]  | 0.01         | 1.6x10-4    | 0.97[0.92-1.03]  | 0.37         | 0.52        | 9.8x10-7 |  |
| rs6554676   | <i>SLC6A18</i>   | A T     | 0.62 [0.51-0.77] | 6.0x10-6  | 0.81 [0.69-0.95]  | 0.008     | 0.04     | 0.80 [0.61-1.05]  | 0.11        | 0.81 [0.67-0.99] | 0.04  | 0.89      | 0.68 [0.58-0.81] | 6.1x10-6     | 0.07        | 0.81 [0.72-92]   | 0.001        | 0.67        | 0.09     |  |
| rs10484683  | <i>SAMD5</i>     | G A     | 0.96 [0.87-1.07] | 0.48      | 0.8 [0.74-0.88]   | 4.7x10-7  | 0.05     | 1.04 [0.89-1.21]  | 0.63        | 0.93 [0.82-1.04] | 0.19  | 0.1       | 0.98[0.90-1.07]  | 0.68         | 2.9x10-4    | 0.83[0.78-0.89]  | 1.7x10-8     | 0.2         | 0.1      |  |
| rs78971134  | <i>BTBD11</i>    | G A     | 0.91 [0.78-1.06] | 0.23      | 0.69 [0.61-0.79]  | 4.5x10-8  | 0.02     | 0.97 [0.78-1.20]  | 0.78        | 0.87 [0.74-1.03] | 0.1   | 0.35      | 0.93[0.82-1.06]  | 0.26         | 0.21        | 0.75[0.68-0.83]  | 1.6x10-8     | 0.15        | 0.14     |  |
| rs11744892  | <i>SLIT3</i>     | T C     | 1.24 [1.14-1.37] | 2.0x10-6  | 1.01 [0.94-1.09]  | 0.63      | 4.2x10-4 | 0.96 [0.84-1.09]  | 0.49        | 0.99 [0.90-1.09] | 0.88  | 0.61      | 1.15[1.07-1.23]  | 1.9x10-4     | 0.003       | 1.00[0.95-1.06]  | 0.87         | 0.3         | 0.001    |  |
| rs2530551   | <i>NPSR1</i>     | G A     | 1.23 [1.13-1.34] | 1.0x10-6  | 1 [0.94-1.08]     | 0.84      | 3.5x10-4 | 1.04 [0.92-1.18]  | 0.53        | 1.04 [0.95-1.14] | 0.36  | 0.89      | 1.17[1.09-1.25]  | 1.1x10-5     | 0.02        | 1.01[0.96-1.07]  | 0.61         | 0.63        | 6.1x10-4 |  |
| rs56960822  | <i>UNCX</i>      | T C     | 1.34 [1.19-1.52] | 1.0x10-6  | 1.06 [0.96-1.17]  | 0.21      | 0.001    | 1.01 [0.85-1.20]  | 0.89        | 1.02 [0.90-0.90] | 0.79  | 0.79      | 1.22[1.11-1.35]  | 4.4x10-5     | 0.02        | 1.04[0.97-1.12]  | 0.27         | 0.25        | 0.007    |  |
| rs12930199  | <i>RBFOX1</i>    | G A     | 1.25 [1.15-1.37] | 4.0x10-7  | 1.03 [0.96-1.11]  | 0.38      | 7.2x10-4 | 1.05 [0.92-1.19]  | 0.5         | 1.03 [0.94-1.14] | 0.51  | 0.73      | 1.18[1.10-1.27]  | 4.8x10-6     | 0.17        | 1.03[0.97-1.09]  | 0.28         | 0.46        | 0.002    |  |
| rs1548141   | <i>OR5H6</i>     | A C     | 1.02 [0.95-1.12] | 0.5       | 1.19 [1.11-1.28]  | 4.8x10-7  | 0.003    | 0.94 [0.83-1.06]  | 0.3         | 1.02 [0.93-0.93] | 0.65  | 0.23      | 1.00[0.94-1.06]  | 0.93         | 0.55        | 1.13[1.07-1.19]  | 1.1x10-5     | 0.06        | 0.07     |  |
| rs6583595   | <i>MIR4472-1</i> | T C     | 0.97 [0.87-1.08] | 0.56      | 0.83 [0.75-0.89]  | 7.0x10-6  | 0.006    | 0.88 [0.76-1.02]  | 0.09        | 0.96 [0.86-1.08] | 0.53  | 0.34      | 0.98[0.90-1.07]  | 0.64         | 0.26        | 1.13[1.06-1.20]  | 2.7x10-4     | 0.01        | 0.36     |  |
| rs4074759   | <i>BAI1</i>      | A G     | 0.96 [0.87-1.08] | 0.57      | 0.81 [0.74-0.89]  | 8.0x10-6  | 0.02     | 1.09 [0.93-1.29]  | 0.27        | 1.01 [0.89-1.13] | 0.9   | 0.49      | 1.00[0.91-1.09]  | 0.95         | 0.31        | 0.87[0.81-0.93]  | 1.1x10-4     | 0.03        | 0.11     |  |
| rs7076813   | <i>GRK5</i>      | A G     | 0.99 [0.89-1.09] | 0.76      | 1.2 [1.11-1.3]    | 6.0x10-6  | 0.003    | 0.96 [0.83-1.10]  | 0.52        | 1.03 [0.93-1.15] | 0.54  | 0.34      | 0.99[0.91-1.08]  | 0.85         | 0.92        | 0.89[0.84-0.95]  | 2.9x10-4     | 0.007       | 7.3x10-4 |  |
| rs12364512  | <i>SPATA19</i>   | A G     | 1.34 [1.19-1.53] | 4.0x10-6  | 1.02 [0.92-1.13]  | 0.68      | 3.7x10-4 | 0.87 [0.73-1.05]  | 0.14        | 1 [0.88-1.15]    | 0.97  | 0.27      | 1.18[1.06-1.30]  | 0.002        | 5.0x10-4    | 1.01[0.94-1.10]  | 0.74         | 0.96        | 3.2x10-4 |  |
| rs35121694  | <i>KIAA0930</i>  | A G     | 1.3 [1.16-1.47]  | 7.0x10-6  | 0.97 [0.89-1.07]  | 0.61      | 1.9x10-4 | 0.9 [0.77-1.06]   | 0.21        | 1.1 [0.98-1.23]  | 0.12  | 0.06      | 1.15[1.05-1.26]  | 0.002        | 4.1x10-4    | 1.01[0.95-1.09]  | 0.7          | 0.07        | 1.9x10-5 |  |

OR[95%CI]= Odds Ratio 95% confidence interval

Meta P-Value= Meta analysis P-value

Het P-value= Heterogeneity P-value among studies

P-int= sex-interaction or sex-difference P-value

Supplementary Table 4

Differential gene expression between males and females in 279 normal and 574 kidney tumour tissues

|                  | Normal Tissue   |                      |                      | Tumour Tissue   |                    |                      |
|------------------|-----------------|----------------------|----------------------|-----------------|--------------------|----------------------|
|                  | Log Fold Change | P-Value              | FDR adjusted P-value | Log Fold Change | P-Value            | FDR adjusted P-value |
| <i>DPF3</i>      | -0.01           | 0.13                 | 0.28                 | -0.02           | 0.02               | 0.09                 |
| <i>EPAS1</i>     | 0.06            | 0.23                 | 0.39                 | -0.03           | 0.32               | 0.42                 |
| <i>RBFOX1**</i>  | 0.01            | 0.19                 | 0.36                 | -0.01           | 0.10               | 0.21                 |
| <i>SAMD5</i>     | -0.01           | 0.84                 | 0.84                 | -0.09           | 1x10 <sup>-5</sup> | 8.5x10 <sup>-5</sup> |
| <i>OR5H6**</i>   | 0.00            | 0.67                 | 0.74                 | 0.004           | 0.41               | 0.50                 |
| <i>BTBD11</i>    | -0.14           | 9.8x10 <sup>-4</sup> | 0.01                 | -0.01           | 0.17               | 0.29                 |
| <i>BBS9</i>      | 0.02            | 0.04                 | 0.14                 | -0.004          | 0.63               | 0.67                 |
| <i>SLIT3</i>     | -0.05           | 0.36                 | 0.51                 | 0.01            | 0.74               | 0.74                 |
| <i>NPSR1*</i>    | -0.02           | 0.04                 | 0.14                 | 0.003           | 0.58               | 0.66                 |
| <i>UNCX</i>      | -0.02           | 0.03                 | 0.14                 | 0.01            | 0.04               | 0.14                 |
| <i>STEAP3</i>    | -0.03           | 0.32                 | 0.49                 | -0.01           | 0.07               | 0.17                 |
| <i>SLC6A18</i>   | 0.16            | 0.11                 | 0.27                 | -0.03           | 0.31               | 0.42                 |
| <i>MIR4472-1</i> | NA              | NA                   | NA                   | NA              | NA                 | NA                   |
| <i>BAI1</i>      | 0.02            | 0.06                 | 0.17                 | 0.01            | 0.13               | 0.25                 |
| <i>GRK5</i>      | -0.01           | 0.67                 | 0.74                 | -0.05           | 0.02               | 0.09                 |
| <i>SPATA19**</i> | 0.00            | 0.70                 | 0.74                 | 0.01            | 0.24               | 0.37                 |
| <i>KIAA0930</i>  | -0.01           | 0.6                  | 0.74                 | -0.03           | 0.05               | 0.14                 |

\*Transcript expressed in less than 10% samples in normal tissues

\*\* Transcript expressed in less than 10% samples in both normal and tumour tissues

Supplementary Table 5: Results of sex-specific eQTL analysis of the 17 SNP-transcript pairs in Normal and Tumour kidney tissues

| SNP         | Gene            | Kidney Normal Tissue |         |      |        |         |      | Kidney Tumour Tissue |                      |                      |       |                      |       |
|-------------|-----------------|----------------------|---------|------|--------|---------|------|----------------------|----------------------|----------------------|-------|----------------------|-------|
|             |                 | Female               |         |      | Male   |         |      | Female               |                      |                      | Male  |                      |       |
|             |                 | Beta                 | P-Value | FDR  | Beta   | P-Value | FDR  | Beta                 | P-Value              | FDR                  | Beta  | P-Value              | FDR   |
| rs4074759   | <i>BAI1</i>     | -0.01                | 0.75    | 0.91 | -0.001 | 0.90    | 0.98 | -0.01                | 0.67                 | 0.91                 | -0.01 | 0.67                 | 0.92  |
| rs147304092 | <i>BBS9</i>     | 0.01                 | 0.69    | 0.91 | -0.01  | 0.65    | 0.98 | 0.05                 | 0.21                 | 0.91                 | 0.04  | 0.34                 | 0.92  |
| rs78971134  | <i>BTBD11</i>   | -0.03                | 0.77    | 0.91 | 0.02   | 0.78    | 0.98 | 0.17                 | 0.14                 | 0.91                 | 0.06  | 0.59                 | 0.92  |
| rs4903064   | <i>DPF3</i>     | 0.01                 | 0.72    | 0.91 | -0.02  | 0.16    | 0.98 | 0.06                 | 1.2x10 <sup>-6</sup> | 2.6x10 <sup>-5</sup> | 0.03  | 2.0x10 <sup>-4</sup> | 0.004 |
| rs2121266   | <i>EPAS1</i>    | -0.01                | 0.91    | 0.91 | 0.03   | 0.52    | 0.98 | 0.05                 | 0.59                 | 0.91                 | -0.03 | 0.69                 | 0.92  |
| rs7076813   | <i>GRK5</i>     | -0.07                | 0.13    | 0.91 | 0.01   | 0.83    | 0.98 | 0.02                 | 0.27                 | 0.91                 | 0.01  | 0.43                 | 0.92  |
| rs35121694  | <i>KIAA0930</i> | -0.04                | 0.46    | 0.91 | 0.02   | 0.69    | 0.98 | 0.05                 | 0.35                 | 0.91                 | 0.00  | 0.98                 | 0.98  |
| rs6583595   | <i>MIR4472</i>  | NA                   | NA      | NA   | NA     | NA      | NA   | NA                   | NA                   | NA                   | NA    | NA                   | NA    |
| rs2530551   | <i>NPSR1</i>    | NA                   | NA      | NA   | NA     | NA      | NA   | 0.01                 | 0.10                 | 0.91                 | -0.01 | 0.34                 | 0.92  |
| rs1548141   | <i>OR5H6</i>    | NA                   | NA      | NA   | NA     | NA      | NA   | NA                   | NA                   | NA                   | NA    | NA                   | NA    |
| rs12930199  | <i>RBFOX1</i>   | NA                   | NA      | NA   | NA     | NA      | NA   | NA                   | NA                   | NA                   | NA    | NA                   | NA    |
| rs10484683  | <i>SAMD5</i>    | 0.01                 | 0.91    | 0.91 | 0.01   | 0.79    | 0.98 | -0.03                | 0.44                 | 0.91                 | 0.02  | 0.41                 | 0.92  |
| rs6554676   | <i>SLC6A18</i>  | -0.08                | 0.76    | 0.91 | -0.23  | 0.23    | 0.98 | -0.01                | 0.90                 | 0.95                 | -0.21 | 0.01                 | 0.06  |
| rs11744892  | <i>SLIT3</i>    | -0.05                | 0.45    | 0.91 | -0.02  | 0.61    | 0.98 | 0.03                 | 0.67                 | 0.91                 | -0.01 | 0.84                 | 0.92  |
| rs12364512  | <i>SPATA19</i>  | NA                   | NA      | NA   | NA     | NA      | NA   | NA                   | NA                   | NA                   | NA    | NA                   | NA    |
| rs13027293  | <i>STEAP3</i>   | -0.04                | 0.44    | 0.91 | 0.01   | 0.72    | 0.98 | -0.06                | 0.53                 | 0.91                 | 0.01  | 0.93                 | 0.98  |
| rs56960822  | <i>UNCX</i>     | -0.02                | 0.22    | 0.91 | 0.00   | 0.68    | 0.98 | -0.02                | 0.20                 | 0.91                 | -0.02 | 0.06                 | 0.44  |

NA= transcript not available or expressed in less than 10% samples
